# Supplementary material
Source: PubMed Central journal article supplement (PMC8769496)

**Supplemental Figure S1.** Flow diagram

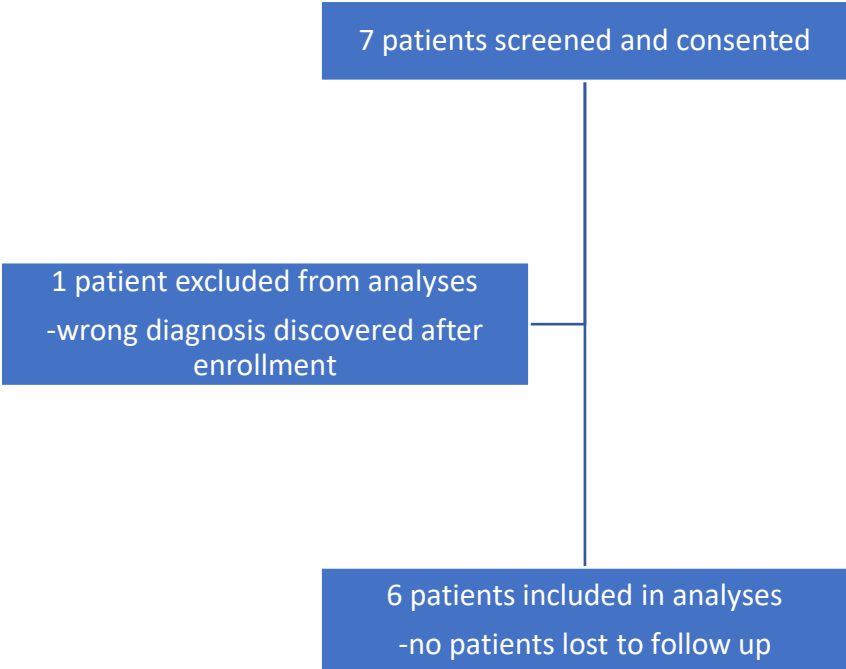

Supplement: NIHMS1713690-supplement-fS1.pdf [file NIHMS1713690-supplement-fS1.pdf]
